# Supplementary material
Source: PubMed Central journal article supplement (PMC6608595)
Supplement: NIHMS1529018-supplement-1.pdf [file NIHMS1529018-supplement-1.pdf]

## Supplementary Information

**Supplemental Figure 1. Related to Figure 1. Case-by-case comparison of the number of Nestin<sup>+</sup>Ki67<sup>+</sup> cells and Nestin<sup>+</sup>PCNA<sup>+</sup> cells in all 18 subjects.**

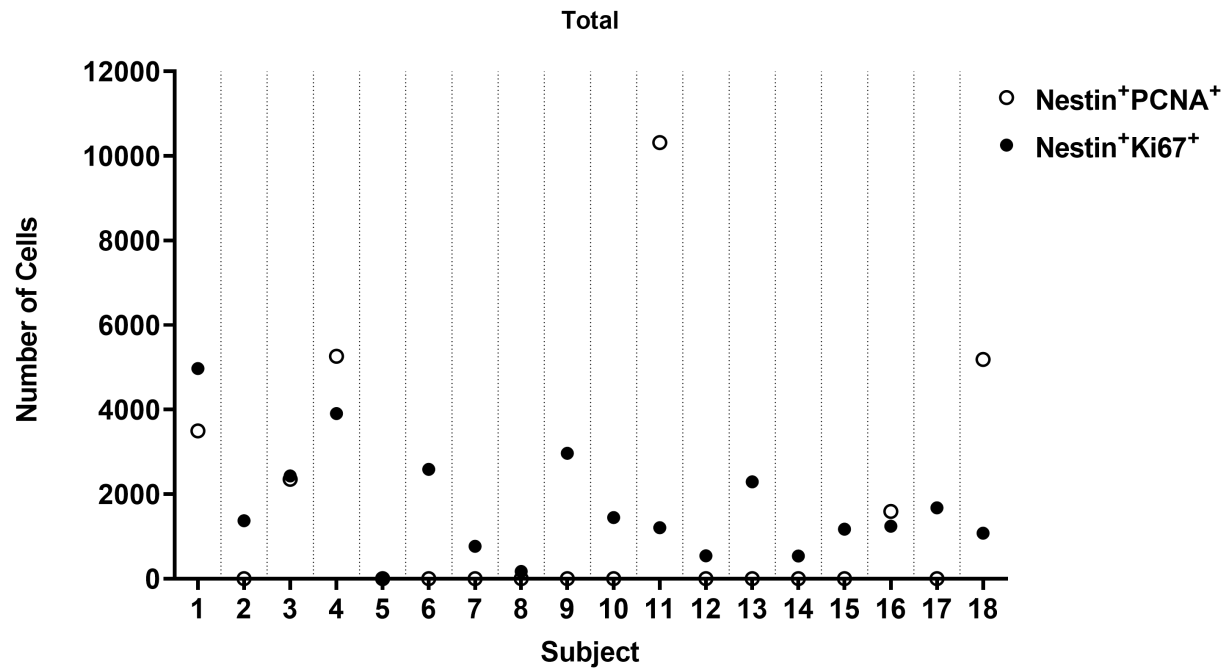

**Supplemental Figure 2. Related to Figure 1, 2. Spearman's rank-order correlation of neurogenic proxy markers with postmortem interval.** **a.** Nestin<sup>+</sup> cells in the GCL (Spearman  $r = -0.328$ ,  $p = 0.183$ ). **b.** Nestin<sup>+</sup> cells in the SGL (Spearman  $r = -0.613$ ,  $p = 0.007$ ). **c.** Nestin<sup>+</sup>PCNA<sup>+</sup> cells in the DG (Spearman  $r = 0.138$ ,  $p = 0.586$ ). **d.** Nestin<sup>+</sup>Sox2<sup>+</sup> cells in the DG (Spearman  $r = 0.205$ ,  $p = 0.413$ ). **e.** PCNA<sup>+</sup> cells in the GCL (Spearman  $r = -0.461$ ,  $p = 0.054$ ). **f.** PCNA<sup>+</sup> cells in the SGL (Spearman  $r = -0.503$ ,  $p = 0.034$ ). **g.** Nestin<sup>+</sup>Sox2<sup>+</sup>Ki67<sup>+</sup> cells in the DG (Spearman  $r = -0.259$ ,  $p = 0.299$ ). **h.** Nestin<sup>+</sup>Ki67<sup>+</sup> cells in the DG (Spearman  $r = -0.003$ ,  $p = 0.990$ ).

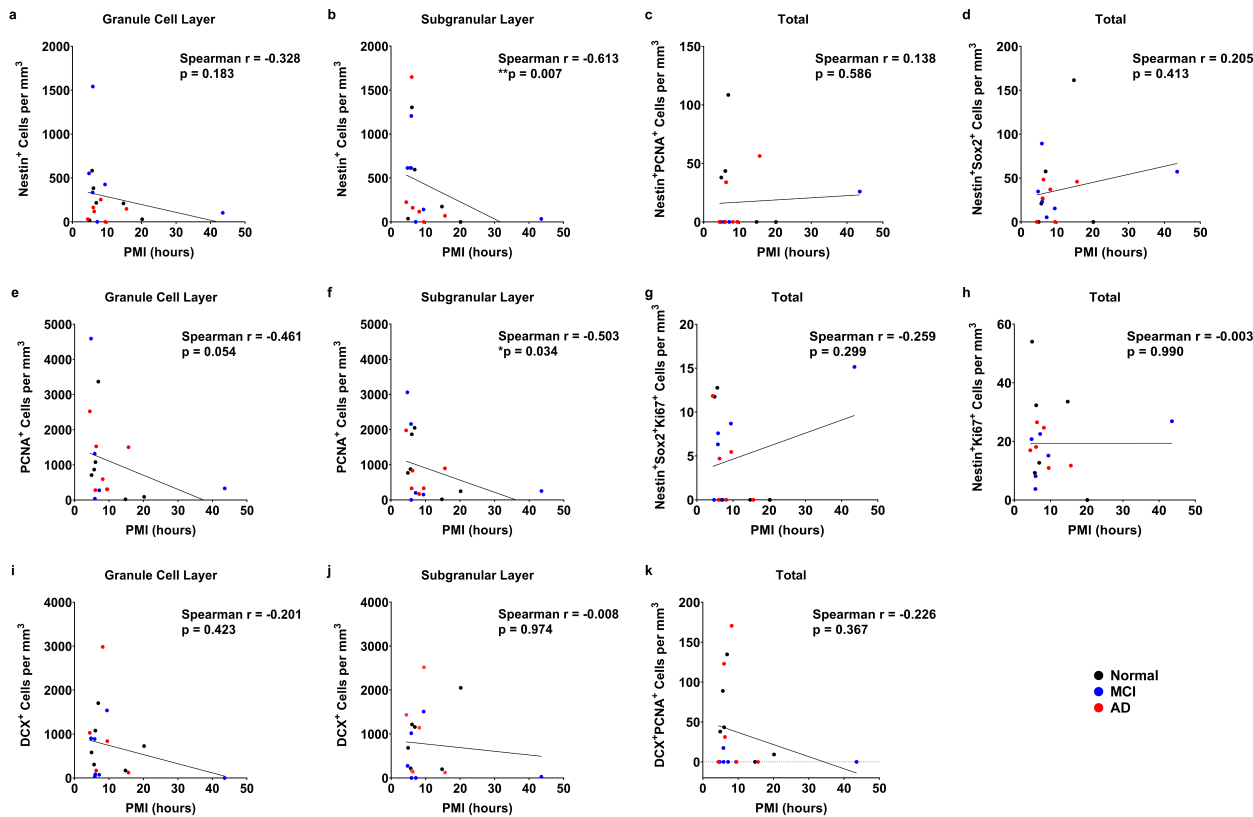

**i.** DCX<sup>+</sup> cells in the GCL (Spearman  $r = -0.201$ ,  $p = 0.423$ ).  
**j.** DCX<sup>+</sup> cells in the SGL (Spearman  $r = -0.008$ ,  $p = 0.974$ ).  
**k.** DCX<sup>+</sup>PCNA<sup>+</sup> cells in the DG (Spearman  $r = -0.226$ ,  $p = 0.367$ ).  
Trendlines are based on GLM analysis.

**Supplemental Figure 3. Related to “Immunofluorescence staining” in STAR Methods. Spearman’s rank-order correlation of neurogenic proxy markers with amyloid plaque burden. a.** Nestin<sup>+</sup> cells in the GCL (Spearman  $r = 0.372$ ,  $p = 0.128$ ). **b.** Nestin<sup>+</sup> cells in the SGL (Spearman  $r = 0.461$ ,  $p = 0.054$ ). **c.** Nestin<sup>+</sup>PCNA<sup>+</sup> cells in the DG (Spearman  $r = -0.392$ ,  $p = 0.108$ ). **d.** Nestin<sup>+</sup>Sox2<sup>+</sup> cells in the DG (Spearman  $r = 0.051$ ,  $p = 0.841$ ). **e.** PCNA<sup>+</sup> cells in the GCL (Spearman  $r = -0.220$ ,  $p = 0.380$ ). **f.** PCNA<sup>+</sup> cells in the SGL (Spearman  $r = -0.338$ ,  $p = 0.170$ ). **g.** Nestin<sup>+</sup>Sox2<sup>+</sup>Ki67<sup>+</sup> cells in the DG (Spearman  $r = 0.193$ ,  $p = 0.442$ ). **h.** Nestin<sup>+</sup>Ki67<sup>+</sup> cells in the DG (Spearman  $r = 0.115$ ,  $p = 0.650$ ). **i.** DCX<sup>+</sup> cells in the GCL (Spearman  $r = 0.038$ ,  $p = 0.880$ ). **j.** DCX<sup>+</sup> cells in the SGL (Spearman  $r = -0.021$ ,  $p = 0.934$ ). **k.** DCX<sup>+</sup>PCNA<sup>+</sup> cells in the DG (Spearman  $r = -0.021$ ,  $p = 0.934$ ). Trendlines are based on GLM analysis.

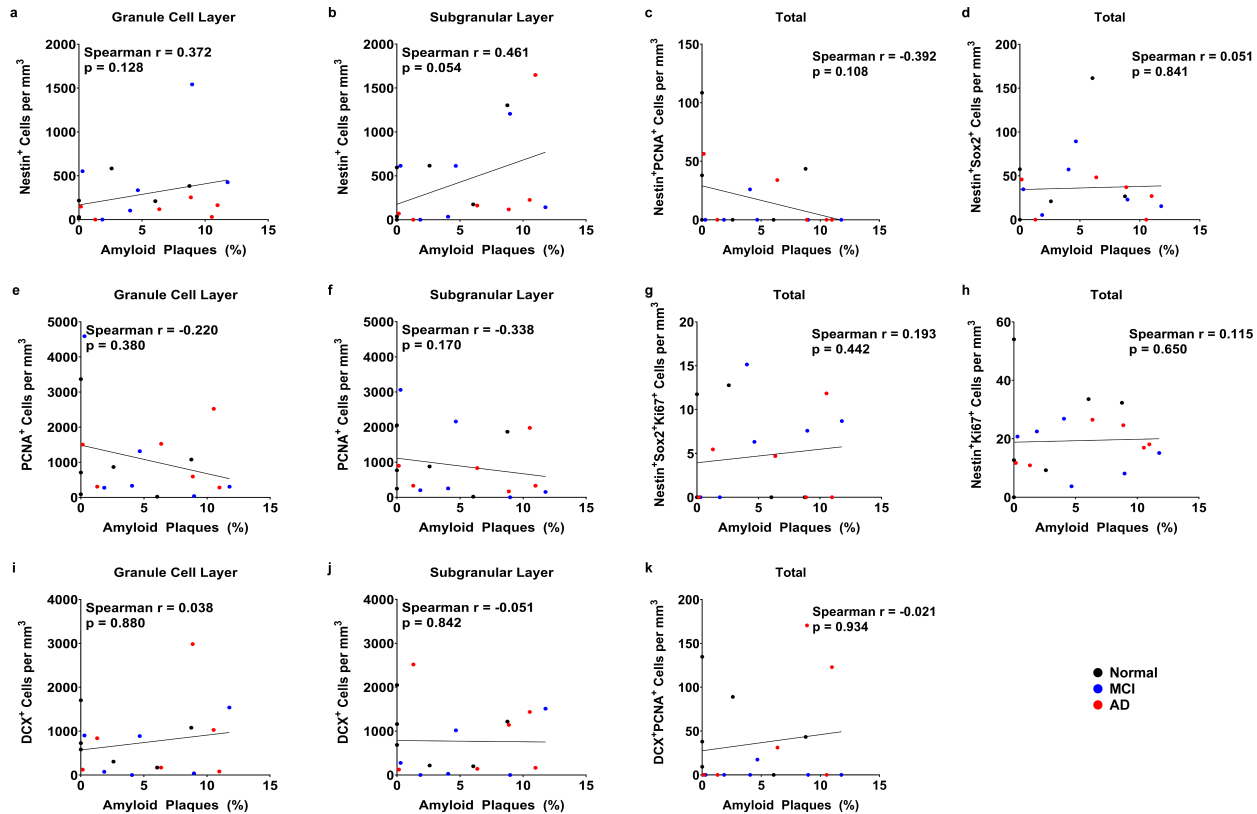

**Supplemental Figure 4. Related to “Immunofluorescence staining” in STAR Methods. Spearman’s rank-order correlation of neurogenic proxy markers with Braak stage.** **a.** Nestin<sup>+</sup> cells in the GCL (Spearman  $r = 0.075$ ,  $p = 0.768$ ). **b.** Nestin<sup>+</sup> cells in the SGL (Spearman  $r = 0.155$ ,  $p = 0.541$ ). **c.** Nestin<sup>+</sup>PCNA<sup>+</sup> cells in the DG (Spearman  $r = -0.365$ ,  $p = 0.163$ ). **d.** Nestin<sup>+</sup>Sox2<sup>+</sup> cells in the DG (Spearman  $r = -0.040$ ,  $p = 0.875$ ). **e.** PCNA<sup>+</sup> cells in the GCL (Spearman  $r = 0.108$ ,  $p = 0.671$ ). **f.** PCNA<sup>+</sup> cells in the SGL (Spearman  $r = 0.099$ ,  $p = 0.695$ ). **g.** Nestin<sup>+</sup>Sox2<sup>+</sup>Ki67<sup>+</sup> cells in the DG (Spearman  $r = 0.420$ ,  $p = 0.082$ ). **h.** Nestin<sup>+</sup>Ki67<sup>+</sup> cells in the DG (Spearman  $r = -0.395$ ,  $p = 0.151$ ). **i.** DCX<sup>+</sup> cells in the GCL (Spearman  $r = -0.124$ ,  $p = 0.624$ ). **j.** DCX<sup>+</sup> cells in the SGL (Spearman  $r = 0.051$ ,  $p = 0.840$ ). **k.** DCX<sup>+</sup>PCNA<sup>+</sup> cells in the DG (Spearman  $r = -0.211$ ,  $p = 0.401$ ). Trendlines are based on GLM analysis.

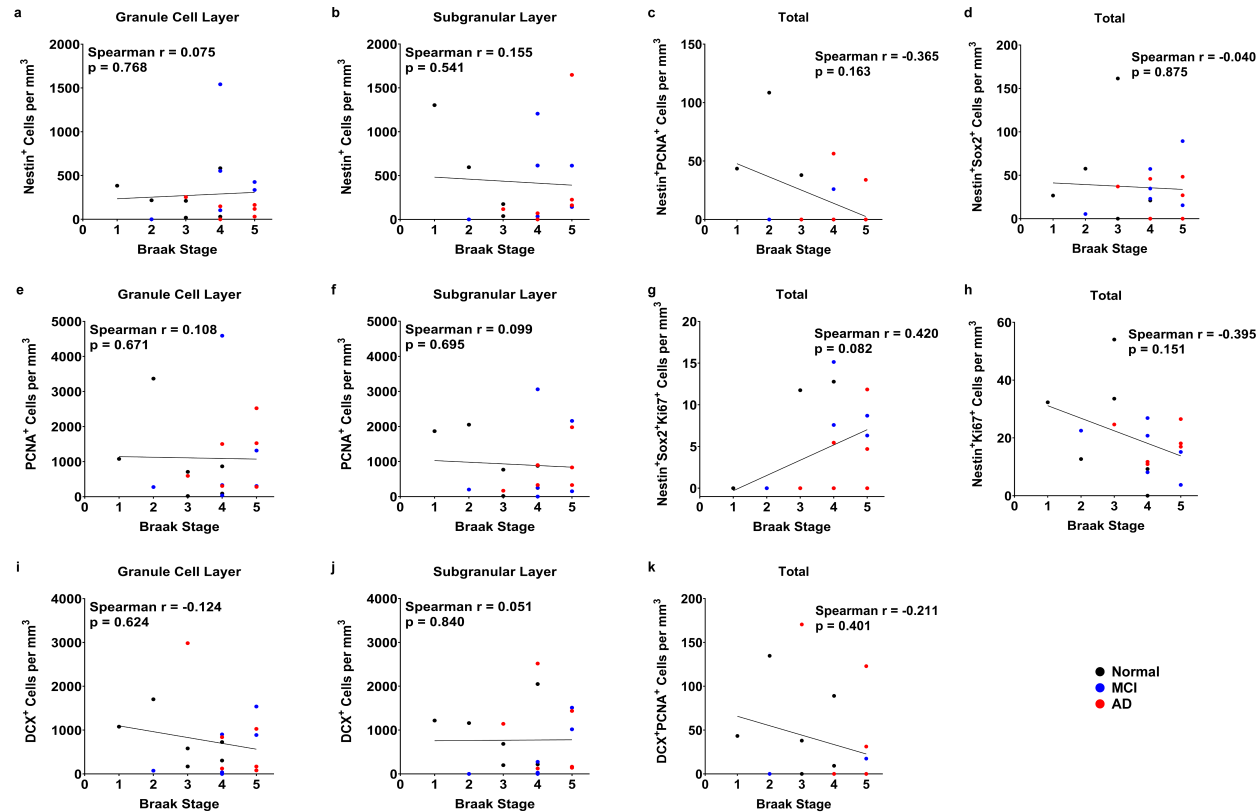



**Supplemental Figure 5. Related to “Immunofluorescence staining” in STAR Methods. Spearman’s rank-order correlation of neurogenic proxy markers with neurofibrillary tangle density. a.** Nestin<sup>+</sup> cells in the GCL (Spearman  $r = 0.052$ ,  $p = 0.839$ ). **b.** Nestin<sup>+</sup> cells in the SGL (Spearman  $r = 0.162$ ,  $p = 0.520$ ). **c.** Nestin<sup>+</sup>PCNA<sup>+</sup> cells in the DG (Spearman  $r = -0.275$ ,  $p = 0.269$ ). **d.** Nestin<sup>+</sup>Sox2<sup>+</sup> cells in the DG (Spearman  $r = -0.217$ ,  $p = 0.388$ ). **e.** PCNA<sup>+</sup> cells in the GCL (Spearman  $r = 0.234$ ,  $p = 0.350$ ). **f.** PCNA<sup>+</sup> cells in the SGL (Spearman  $r = 0.238$ ,  $p = 0.341$ ). **g.** Nestin<sup>+</sup>Sox2<sup>+</sup>Ki67<sup>+</sup> cells in the DG (Spearman  $r = 0.336$ ,  $p = 0.173$ ). **h.** Nestin<sup>+</sup>Ki67<sup>+</sup> cells in the DG (Spearman  $r = -0.379$ ,  $p = 0.121$ ). **i.** DCX<sup>+</sup> cells in the GCL (Spearman  $r = -0.055$ ,  $p = 0.829$ ). **j.** DCX<sup>+</sup> cells in the SGL (Spearman  $r =$

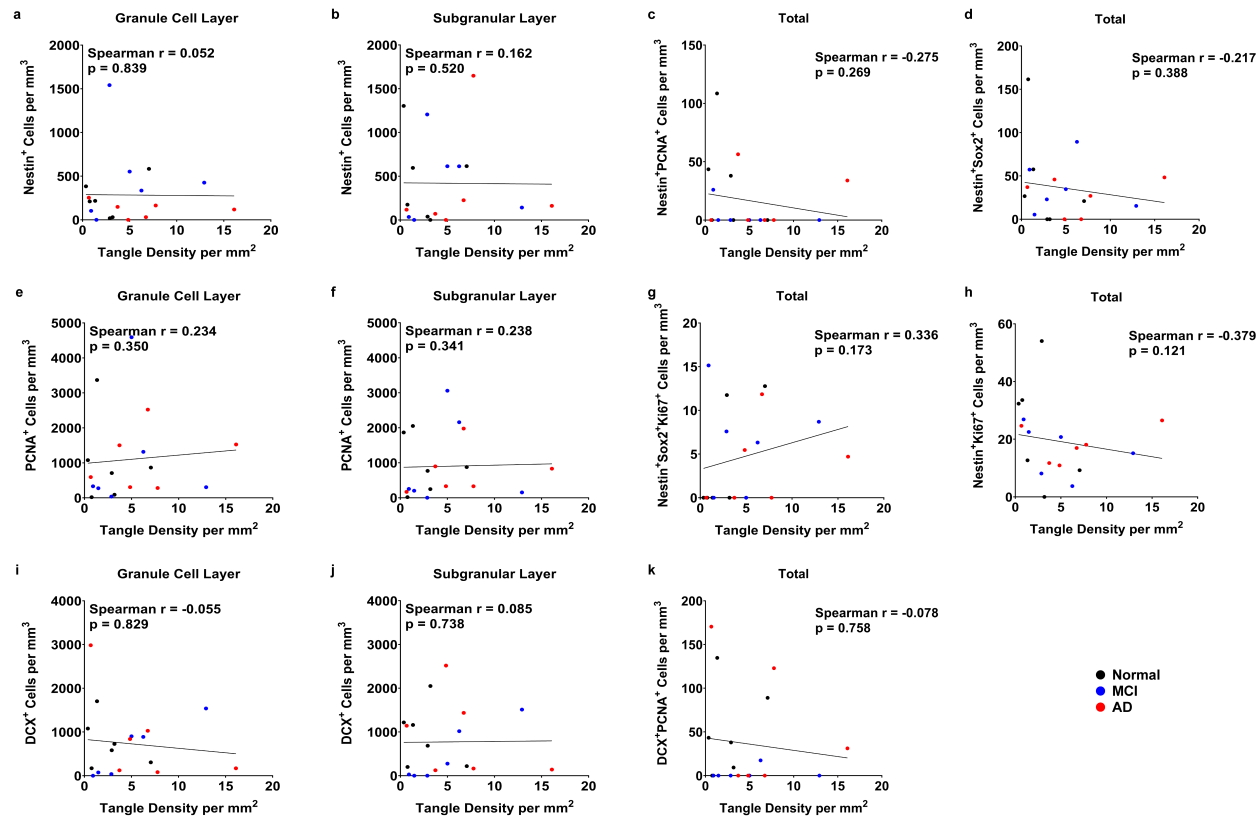

0.085,  $p = 0.738$ ). **k.** DCX<sup>+</sup>PCNA<sup>+</sup> cells in the DG (Spearman  $r = -0.078$ ,  $p = 0.758$ ). Trendlines are based on GLM analysis.

**Supplemental Figure 6. Related to “Hippocampal volume measurement” in STAR Methods. *Ex vivo* T-2 weighted MRI imaging analysis. a.** Representative sagittal T2-weighted post-mortem MRI with the hippocampus outlined in orange. **b.** Slabs containing hippocampus from two subjects (Top – a control, Bottom – AD) are shown. Blocks numbered B4 through B7 for hippocampus are marked in red from individual slabs. **c.** Schematic presentation of hippocampal regions as a function of the position of the section along the anterior-posterior axis. Block labeling (e.g. B4, B5, etc) denote position, in centimeters, posterior to the mamillary bodies. **d.** H&E section of a representative tissue section outline the GCL of the dentate gyrus (solid line) and the SGL of the dentate gyrus (dashed line).

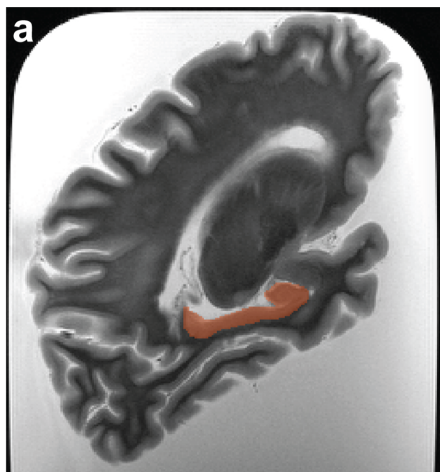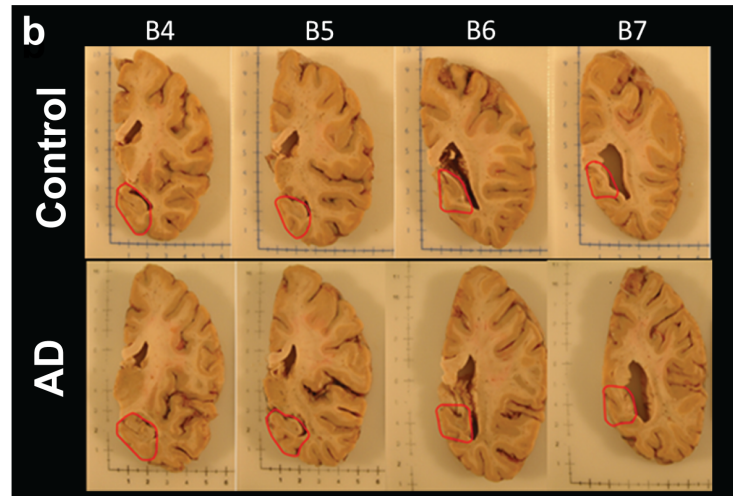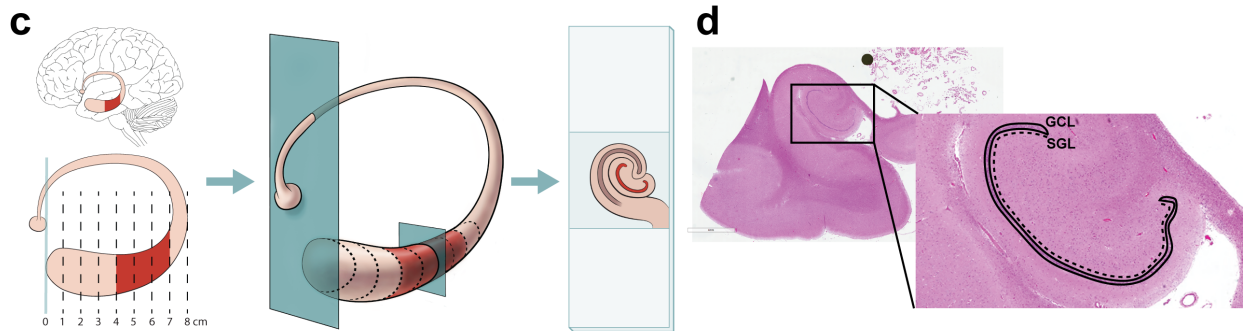

the anterior-posterior axis. Block labeling (e.g. B4, B5, etc) denote position, in centimeters, posterior to the mamillary bodies. **d.** H&E section of a representative tissue section outline the GCL of the dentate gyrus (solid line) and the SGL of the dentate gyrus (dashed line).

**Supplementary Table 1. Related to Figure 1-4. Patient demographics.**

| Subject | PMI (hours) | Age (years) | Gender | Hippocampal Volume (mm <sup>3</sup> ) | APOE Genotype | Clinical Diagnosis | Pathologic AD (Y/N) | Braak Stage | Amyloid Plaques (%) | Tangle Density (per mm <sup>3</sup> ) |
|---------|-------------|-------------|--------|---------------------------------------|---------------|--------------------|---------------------|-------------|---------------------|---------------------------------------|
| 1       | 4.92        | 92          | M      | 3017                                  | ε3/ε3         | Normal             | N                   | 3           | 0.00                | 2.90                                  |
| 2       | 6.00        | 93          | F      | 2746                                  | ε2/ε3         | AD                 | Y                   | 5           | 10.98               | 7.77                                  |
| 3       | 43.55       | 86          | F      | 3004                                  | ε3/ε3         | MCI                | Y                   | 4           | 4.06                | 0.91                                  |
| 4       | 6.05        | 93          | M      | 3582                                  | ε3/ε3         | Normal             | N                   | 1           | 8.76                | 0.36                                  |
| 5       | 20.17       | 79          | F      | 2863                                  | ε3/ε3         | Normal             | N                   | 4           | 0.00                | 3.19                                  |
| 6       | 7.15        | 92          | F      | 4117                                  | ε3/ε4         | MCI                | N                   | 2           | 1.86                | 1.47                                  |
| 7       | 9.50        | 91          | M      | 2225                                  | ε3/ε3         | AD                 | Y                   | 4           | 1.30                | 4.85                                  |
| 8       | 5.83        | 93          | F      | 2225                                  | ε3/ε3         | MCI                | Y                   | 5           | 4.67                | 6.25                                  |
| 9       | 14.77       | 80          | F      | 3062                                  | ε3/ε3         | Normal             | N                   | 3           | 6.05                | 0.76                                  |
| 10      | 4.42        | 93          | F      | 2760                                  | ε3/ε3         | AD                 | Y                   | 5           | 10.53               | 6.73                                  |
| 11      | 6.87        | 92          | M      | 2529                                  | ε3/ε3         | Normal             | N                   | 2           | 0.00                | 1.34                                  |
| 12      | 5.88        | 95          | F      | 2964                                  | ε3/ε3         | MCI                | Y                   | 4           | 8.97                | 2.86                                  |
| 13      | 8.17        | 98          | F      | 3366                                  | ε3/ε3         | AD                 | Y                   | 3           | 8.87                | 0.67                                  |
| 14      | 5.67        | 91          | F      | 2012                                  | ε2/ε3         | Normal             | N                   | 4           | 2.59                | 7.05                                  |
| 15      | 9.42        | 88          | F      | 2500                                  | ε3/ε3         | MCI                | Y                   | 5           | 11.78               | 12.92                                 |
| 16      | 6.27        | 99          | F      | 2458                                  | ε3/ε4         | AD                 | Y                   | 5           | 6.37                | 16.10                                 |
| 17      | 4.77        | 93          | F      | 2648                                  | ε2/ε3         | MCI                | N                   | 4           | 0.29                | 5.00                                  |
| 18      | 15.63       | 85          | F      | 2912                                  | ε3/ε3         | AD                 | Y                   | 4           | 0.15                | 3.72                                  |

**Supplementary Table 2. Related to Figure 1-4. Antibodies used in this study.**

| <b>Primary Antibody</b> | <b>Species</b> | <b>Dilution</b> | <b>Manufacturer</b> | <b>Catalog No.</b> | <b>Lot No.</b>  |
|-------------------------|----------------|-----------------|---------------------|--------------------|-----------------|
| Nestin                  | Rabbit         | 1:250           | EMD Millipore       | ABD69              | 2592765/2986140 |
| PCNA                    | Mouse          | 1:500           | Santa Cruz          | sc-56              | H2103           |
| Doublecortin            | Goat           | 1:250           | Santa Cruz          | sc-8066            | C1615/K1215     |
| Doublecortin            | Rabbit         | 1:750           | Abcam               | ab18723            | GR3225952-1     |
| Sox2                    | Goat           | 1:500           | Santa Cruz          | sc-17320           | A2215           |
| Ki67                    | Mouse          | 1:100           | Leica Biosystems    | NCL-L-Ki67-MM1     | 6064465         |
| Syntaxin                | Mouse          | 1:10            | In-house            | SP7                | Monoclonal      |
| SNAP-25                 | Mouse          | 1:10            | In-house            | SP12               | Monoclonal      |
| Complexin-II            | Mouse          | 1:10            | In-house            | LP27               | Monoclonal      |
